# Supplementary material
Source: Springer Nature journal article supplement (https://www.springermedizin.de/resource/supplementary/13054_2012_557_MOESM3_ESM.pdf/9708806)

# Median Paw-peak (cmH<sub>2</sub>O)

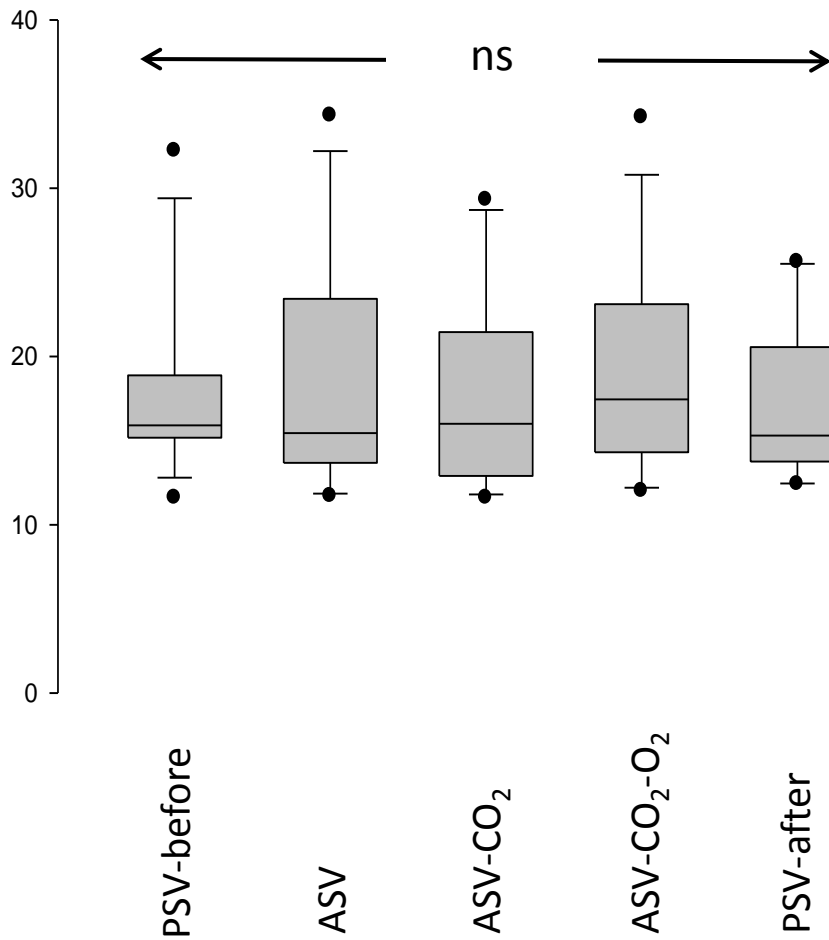

# SD of Paw-peak (cmH<sub>2</sub>O)

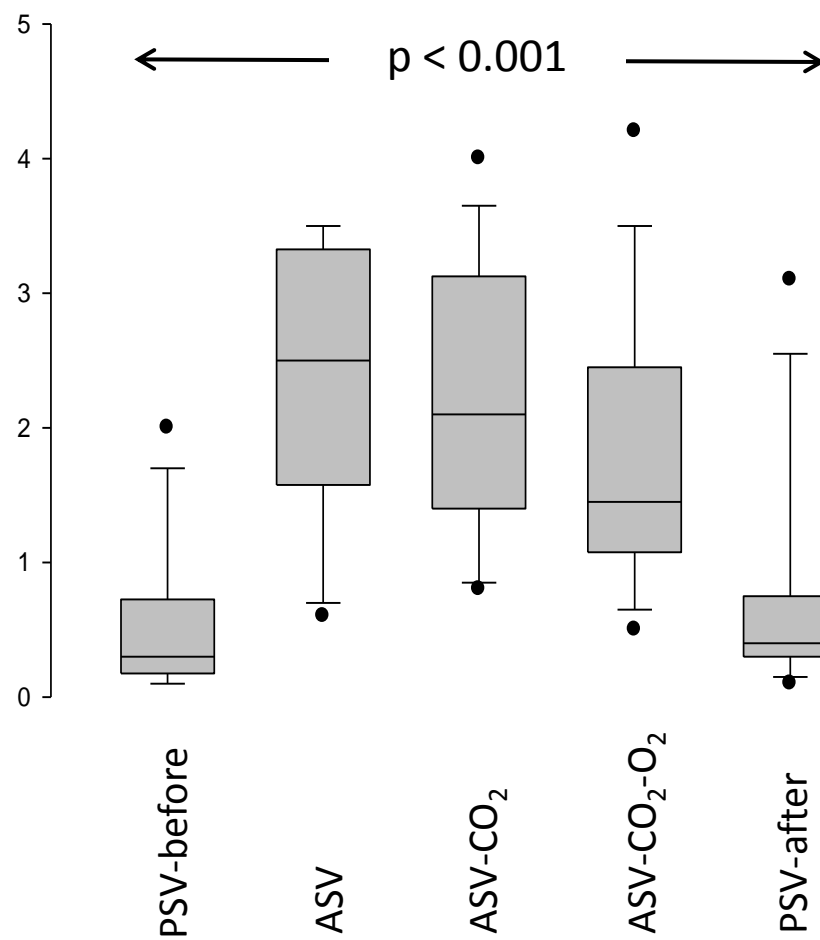

Supplement: MOESM3 [file 9708806]
